# Supplementary material for: Genomic Characterization of Methicillin-Resistant Staphylococcus aureus (MRSA) by High-Throughput Sequencing in a Tertiary Care Hospital
Source: MDPI journal article supplement (doi:10.3390/genes11101219), 2020-10-17
Supplement: s1 [file s1]

**Significant Results (p < 0.05) for ALL vs. ALL Fisher's Exact Test Results:**

aac6.aph2 seb

|   |    |   |
|---|----|---|
|   | 0  | 1 |
| 0 | 2  | 4 |
| 1 | 11 | 1 |

Fisher's Exact Test p-value = 0.0217086834733893

-----

aac6.aph2 sen

|   |    |   |
|---|----|---|
|   | 0  | 1 |
| 0 | 2  | 4 |
| 1 | 12 | 0 |

Fisher's Exact Test p-value = 0.00490196078431372

-----

aac6.aph2 CN

|   |   |   |
|---|---|---|
|   | 0 | 1 |
| 0 | 6 | 0 |
| 1 | 3 | 9 |

Fisher's Exact Test p-value = 0.0090497737556561

-----

aac6.aph2            Sequence.types

|   |     |          |       |        |      |       |     |     |          |      |       |     |   |
|---|-----|----------|-------|--------|------|-------|-----|-----|----------|------|-------|-----|---|
|   | ST1 | ST1-like | ST121 | ST1535 | ST22 | ST239 | ST5 | ST8 | ST8-like | ST80 | ST913 | STu |   |
| 0 | 0   |          | 0     | 0      | 0    | 1     | 0   | 2   | 1        | 1    | 1     | 0   | 0 |
| 1 | 2   |          | 1     | 1      | 3    | 0     | 2   | 0   | 0        | 0    | 0     | 1   | 2 |

Fisher's Exact Test p-value = 0.0144927536231884

-----

ant.6.Ia aph3.III

|   |    |   |
|---|----|---|
|   | 0  | 1 |
| 0 | 12 | 2 |
| 1 | 0  | 4 |

Fisher's Exact Test p-value = 0.00490196078431373

-----

ant.6.Ia lukS.PV

|   |    |   |
|---|----|---|
|   | 0  | 1 |
| 0 | 13 | 1 |
| 1 | 1  | 3 |

Fisher's Exact Test p-value = 0.0186274509803922

-----

ant.6.Ia lukF.PV

|   |    |   |
|---|----|---|
|   | 0  | 1 |
| 0 | 13 | 1 |
| 1 | 1  | 3 |

Fisher's Exact Test p-value = 0.0186274509803922

-----

ant.6.Ia Severity

|   |   |    |
|---|---|----|
|   | N | Y  |
| 0 | 3 | 11 |
| 1 | 4 | 0  |

Fisher's Exact Test p-value = 0.011437908496732

-----

ant.6.Ia Sample

|   | Blood | ETA | Infected prosthesis | Tissue | Wound |
|---|-------|-----|---------------------|--------|-------|
| 0 | 6     | 5   | 1                   | 2      | 0     |
| 1 | 0     | 0   | 0                   | 1      | 3     |

Fisher's Exact Test p-value = 0.00249875062468766

-----

aph3.III sek

|   | 0  | 1 |
|---|----|---|
| 0 | 12 | 0 |
| 1 | 2  | 4 |

Fisher's Exact Test p-value = 0.00490196078431372

-----

aph3.III seq

|   | 0  | 1 |
|---|----|---|
| 0 | 12 | 0 |
| 1 | 2  | 4 |

Fisher's Exact Test p-value = 0.00490196078431372

-----

aph3.III SCCmec.element

|   | I(1B), VI(4B) | III(3A) | IVa(2B) | IVc(2B) | No SCC detected | V(5C2 and 5) | V(5C2) | VI(4B) |
|---|---------------|---------|---------|---------|-----------------|--------------|--------|--------|
| 0 | 1             | 0       | 1       | 0       | 1               | 1            | 6      | 2      |
| 1 | 0             | 2       | 0       | 1       | 0               | 2            | 0      | 1      |

Fisher's Exact Test p-value = 0.0359820089955022

-----

aph3.III Severity

|   | N | Y  |
|---|---|----|
| 0 | 2 | 10 |
| 1 | 5 | 1  |

Fisher's Exact Test p-value = 0.0128205128205128

-----

aph3.III Sample

|   | Blood | ETA | Infected prosthesis | Tissue | Wound |
|---|-------|-----|---------------------|--------|-------|
| 0 | 5     | 5   | 1                   | 1      | 0     |
| 1 | 1     | 0   | 0                   | 2      | 3     |

Fisher's Exact Test p-value = 0.0199900049975013

-----

aadD inuA

|   | 0  | 1 |
|---|----|---|
| 0 | 14 | 0 |
| 1 | 1  | 3 |

Fisher's Exact Test p-value = 0.00490196078431373

-----

aadD sak

|   | 0 | 1  |
|---|---|----|
| 0 | 2 | 12 |
| 1 | 4 | 0  |

Fisher's Exact Test p-value = 0.00490196078431373

-----

erm.C sek

|   | 0  | 1 |
|---|----|---|
| 0 | 12 | 1 |
| 1 | 2  | 3 |

Fisher's Exact Test p-value = 0.0441176470588235

-----

erm.C seq

|   |    |   |
|---|----|---|
|   | 0  | 1 |
| 0 | 12 | 1 |
| 1 | 2  | 3 |

Fisher's Exact Test p-value = 0.0441176470588235

inuA sak

|   |   |    |
|---|---|----|
|   | 0 | 1  |
| 0 | 3 | 12 |
| 1 | 3 | 0  |

Fisher's Exact Test p-value = 0.0245098039215686

fex.A tet.M

|   |    |   |
|---|----|---|
|   | 0  | 1 |
| 0 | 14 | 2 |
| 1 | 0  | 2 |

Fisher's Exact Test p-value = 0.0392156862745098

fex.A aur

|   |   |    |
|---|---|----|
|   | 0 | 1  |
| 0 | 0 | 16 |
| 1 | 2 | 0  |

Fisher's Exact Test p-value = 0.00653594771241829

fex.A splA

|   |   |    |
|---|---|----|
|   | 0 | 1  |
| 0 | 2 | 14 |
| 1 | 2 | 0  |

Fisher's Exact Test p-value = 0.0392156862745098

fex.A splB

|   |   |    |
|---|---|----|
|   | 0 | 1  |
| 0 | 1 | 15 |
| 1 | 2 | 0  |

Fisher's Exact Test p-value = 0.0196078431372549

fex.A HA.CA.CO

|   |    |    |    |
|---|----|----|----|
|   | CA | CO | HA |
| 0 | 9  | 2  | 5  |
| 1 | 0  | 2  | 0  |

Fisher's Exact Test p-value = 0.0384807596201899

tet.M aur

|   |   |    |
|---|---|----|
|   | 0 | 1  |
| 0 | 0 | 14 |
| 1 | 2 | 2  |

Fisher's Exact Test p-value = 0.0392156862745098

tet.M SCCmec.element

|   |        |        |         |         |         |                 |              |        |        |
|---|--------|--------|---------|---------|---------|-----------------|--------------|--------|--------|
|   | I(1B), | VI(4B) | III(3A) | IVa(2B) | IVc(2B) | No SCC detected | V(5C2 and 5) | V(5C2) | VI(4B) |
| 0 |        | 0      | 0       | 1       | 1       | 1               | 3            | 6      | 2      |
| 1 | 1      | 1      | 2       | 0       | 0       | 0               | 0            | 0      | 1      |

Fisher's Exact Test p-value = 0.0439780109945027

aur splA

|   |   |    |
|---|---|----|
|   | 0 | 1  |
| 0 | 2 | 0  |
| 1 | 2 | 14 |

Fisher's Exact Test p-value = 0.0392156862745097

---

aur splB

|   |   |    |
|---|---|----|
|   | 0 | 1  |
| 0 | 2 | 0  |
| 1 | 1 | 15 |

Fisher's Exact Test p-value = 0.0196078431372549

---

aur HA.CA.CO

|   |    |    |    |
|---|----|----|----|
|   | CA | CO | HA |
| 0 | 0  | 2  | 0  |
| 1 | 9  | 2  | 5  |

Fisher's Exact Test p-value = 0.0419790104947526

---

splA splB

|   |   |    |
|---|---|----|
|   | 0 | 1  |
| 0 | 3 | 1  |
| 1 | 0 | 14 |

Fisher's Exact Test p-value = 0.00490196078431373

---

splA splE

|   |   |    |
|---|---|----|
|   | 0 | 1  |
| 0 | 4 | 0  |
| 1 | 2 | 12 |

Fisher's Exact Test p-value = 0.00490196078431373

---

splA lukD

|   |   |    |
|---|---|----|
|   | 0 | 1  |
| 0 | 2 | 2  |
| 1 | 0 | 14 |

Fisher's Exact Test p-value = 0.0392156862745098

---

splA seg

|   |    |   |
|---|----|---|
|   | 0  | 1 |
| 0 | 1  | 3 |
| 1 | 13 | 1 |

Fisher's Exact Test p-value = 0.0186274509803922

---

splA sei

|   |    |   |
|---|----|---|
|   | 0  | 1 |
| 0 | 1  | 3 |
| 1 | 13 | 1 |

Fisher's Exact Test p-value = 0.0186274509803922

---

splA sem

|   |    |   |
|---|----|---|
|   | 0  | 1 |
| 0 | 2  | 2 |
| 1 | 14 | 0 |

Fisher's Exact Test p-value = 0.0392156862745098

---

splA seo

|   |    |   |
|---|----|---|
|   | 0  | 1 |
| 0 | 1  | 3 |
| 1 | 13 | 1 |

Fisher's Exact Test p-value = 0.0186274509803922

-----

splA Sample

|   |       |     |          |           |        |       |
|---|-------|-----|----------|-----------|--------|-------|
|   | Blood | ETA | Infected | prothesis | Tissue | Wound |
| 0 | 0     | 3   |          | 1         | 0      | 0     |
| 1 | 6     | 2   |          | 0         | 3      | 3     |

Fisher's Exact Test p-value = 0.0239880059970015

-----

splB splE

|   |   |    |
|---|---|----|
|   | 0 | 1  |
| 0 | 3 | 0  |
| 1 | 3 | 12 |

Fisher's Exact Test p-value = 0.0245098039215686

-----

splB lukD

|   |   |    |
|---|---|----|
|   | 0 | 1  |
| 0 | 2 | 1  |
| 1 | 0 | 15 |

Fisher's Exact Test p-value = 0.0196078431372549

-----

splB WardType

|   |      |      |     |      |
|---|------|------|-----|------|
|   | BMTU | MICU | MSU | SICU |
| 0 | 0    | 2    | 0   | 1    |
| 1 | 1    | 1    | 11  | 2    |

Fisher's Exact Test p-value = 0.0364817591204398

-----

splE seg

|   |    |   |
|---|----|---|
|   | 0  | 1 |
| 0 | 2  | 4 |
| 1 | 12 | 0 |

Fisher's Exact Test p-value = 0.00490196078431372

-----

splE sei

|   |    |   |
|---|----|---|
|   | 0  | 1 |
| 0 | 2  | 4 |
| 1 | 12 | 0 |

Fisher's Exact Test p-value = 0.00490196078431372

-----

splE seo

|   |    |   |
|---|----|---|
|   | 0  | 1 |
| 0 | 2  | 4 |
| 1 | 12 | 0 |

Fisher's Exact Test p-value = 0.00490196078431372

-----

splE seu

|   |    |   |
|---|----|---|
|   | 0  | 1 |
| 0 | 3  | 3 |
| 1 | 12 | 0 |

Fisher's Exact Test p-value = 0.0245098039215686

-----

lukS.PV lukF.PV

|   |    |   |
|---|----|---|
|   | 0  | 1 |
| 0 | 14 | 0 |
| 1 | 0  | 4 |

Fisher's Exact Test p-value = 0.000326797385620915

-----  
lukS.PV Severity

|   |   |    |
|---|---|----|
|   | N | Y  |
| 0 | 3 | 11 |
| 1 | 4 | 0  |

Fisher's Exact Test p-value = 0.011437908496732

-----  
lukS.PV Sample

|   |       |     |                    |        |       |
|---|-------|-----|--------------------|--------|-------|
|   | Blood | ETA | Infected prothesis | Tissue | Wound |
| 0 | 6     | 5   |                    | 0      | 3     |
| 1 | 0     | 0   |                    | 1      | 0     |

Fisher's Exact Test p-value = 0.00149925037481259

-----  
lukF.PV Severity

|   |   |    |
|---|---|----|
|   | N | Y  |
| 0 | 3 | 11 |
| 1 | 4 | 0  |

Fisher's Exact Test p-value = 0.011437908496732

-----  
lukF.PV Sample

|   |       |     |                    |        |       |
|---|-------|-----|--------------------|--------|-------|
|   | Blood | ETA | Infected prothesis | Tissue | Wound |
| 0 | 6     | 5   |                    | 0      | 3     |
| 1 | 0     | 0   |                    | 1      | 0     |

Fisher's Exact Test p-value = 0.00199900049975012

-----  
lukE lukD

|   |   |    |
|---|---|----|
|   | 0 | 1  |
| 0 | 2 | 1  |
| 1 | 0 | 15 |

Fisher's Exact Test p-value = 0.0196078431372549

-----  
lukE sak

|   |   |    |
|---|---|----|
|   | 0 | 1  |
| 0 | 3 | 0  |
| 1 | 3 | 12 |

Fisher's Exact Test p-value = 0.0245098039215686

-----  
lukD scn

|   |   |    |
|---|---|----|
|   | 0 | 1  |
| 0 | 2 | 0  |
| 1 | 2 | 13 |

Fisher's Exact Test p-value = 0.0441176470588235

-----  
lukD SCCmec.element

|   |        |        |         |         |         |                 |              |        |        |
|---|--------|--------|---------|---------|---------|-----------------|--------------|--------|--------|
|   | I(1B), | VI(4B) | III(3A) | IVa(2B) | IVc(2B) | No SCC detected | V(5C2 and 5) | V(5C2) | VI(4B) |
| 0 |        | 1      | 0       | 1       | 0       | 0               | 0            | 0      | 0      |
| 1 |        | 0      | 2       | 0       | 1       | 1               | 3            | 6      | 3      |

Fisher's Exact Test p-value = 0.0494752623688156

-----

seb seg

```
0 1
0 12 1
1 2 3
```

Fisher's Exact Test p-value = 0.0441176470588235

seb sei

```
0 1
0 12 1
1 2 3
```

Fisher's Exact Test p-value = 0.0441176470588235

seb seo

```
0 1
0 12 1
1 2 3
```

Fisher's Exact Test p-value = 0.0441176470588235

seb seu

```
0 1
0 13 0
1 2 3
```

Fisher's Exact Test p-value = 0.0122549019607843

seb Sequence.types

```
ST1 ST1-like ST121 ST1535 ST22 ST239 ST5 ST8 ST8-like ST80 ST913 STu
0 2 1 0 3 1 2 0 0 0 1 1 2
1 0 0 1 0 0 0 2 1 1 0 0 0
```

Fisher's Exact Test p-value = 0.0329835082458771

seb WardType

```
BMTU MICU MSU SICU
0 1 3 9 0
1 0 0 2 3
```

Fisher's Exact Test p-value = 0.0264867566216892

seg sei

```
0 1
0 14 0
1 0 4
```

Fisher's Exact Test p-value = 0.000326797385620915

seg sem

```
0 1
0 14 0
1 2 2
```

Fisher's Exact Test p-value = 0.0392156862745098

seg seo

```
0 1
0 14 0
1 0 4
```

Fisher's Exact Test p-value = 0.000326797385620915

seg seu

```
      0  1
0 14  0
1  1  3
Fisher's Exact Test p-value = 0.00490196078431373
```

seg Sequence.types

```
      ST1 ST1-like ST121 ST1535 ST22 ST239 ST5 ST8 ST8-like ST80 ST913 STu
0  2      1      0      3      0      2      0      1      1      1      1      2
1  0      0      1      0      1      0      2      0      0      0      0      0
Fisher's Exact Test p-value = 0.0484757621189405
```

seh hlgA

```
      0  1
0  1 15
1  2  0
Fisher's Exact Test p-value = 0.0196078431372549
```

sei sem

```
      0  1
0 14  0
1  2  2
Fisher's Exact Test p-value = 0.0392156862745098
```

sei seo

```
      0  1
0 14  0
1  0  4
Fisher's Exact Test p-value = 0.000326797385620915
```

sei seu

```
      0  1
0 14  0
1  1  3
Fisher's Exact Test p-value = 0.00490196078431373
```

sei Sequence.types

```
      ST1 ST1-like ST121 ST1535 ST22 ST239 ST5 ST8 ST8-like ST80 ST913 STu
0  2      1      0      3      0      2      0      1      1      1      1      2
1  0      0      1      0      1      0      2      0      0      0      0      0
Fisher's Exact Test p-value = 0.0409795102448776
```

sek seq

```
      0  1
0 14  0
1  0  4
Fisher's Exact Test p-value = 0.000326797385620915
```

sek SCCmec.element

```
      I(1B), VI(4B) III(3A) IVa(2B) IVc(2B) No SCC detected V(5C2 and 5) V(5C2) VI(4B)
0      1      0      1      1      1      1      6      3
1      0      2      0      0      0      2      0      0
Fisher's Exact Test p-value = 0.0414792603698151
```



sem seo

|      |   |
|------|---|
| 0    | 1 |
| 0 14 | 2 |
| 1 0  | 2 |

Fisher's Exact Test p-value = 0.0392156862745098

sem seu

|      |   |
|------|---|
| 0    | 1 |
| 0 15 | 1 |
| 1 0  | 2 |

Fisher's Exact Test p-value = 0.0196078431372549

sen SCCmec.element

| I(1B), VI(4B) | III(3A) | IVa(2B) | IVc(2B) | No SCC detected | V(5C2 and 5) | V(5C2) | VI(4B) |
|---------------|---------|---------|---------|-----------------|--------------|--------|--------|
| 0             | 1       | 2       | 0       | 0               | 0            | 3      | 6      |
| 1             | 0       | 0       | 1       | 1               | 1            | 0      | 0      |

Fisher's Exact Test p-value = 0.0389805097451274

seo seu

|      |   |
|------|---|
| 0    | 1 |
| 0 14 | 0 |
| 1 1  | 3 |

Fisher's Exact Test p-value = 0.00490196078431373

seo Sequence.types

| ST1 | ST1-like | ST121 | ST1535 | ST22 | ST239 | ST5 | ST8 | ST8-like | ST80 | ST913 | STu |
|-----|----------|-------|--------|------|-------|-----|-----|----------|------|-------|-----|
| 0   | 2        | 1     | 0      | 3    | 0     | 2   | 0   | 1        | 1    | 1     | 2   |
| 1   | 0        | 0     | 1      | 0    | 1     | 0   | 2   | 0        | 0    | 0     | 0   |

Fisher's Exact Test p-value = 0.0434782608695652

seq SCCmec.element

| I(1B), VI(4B) | III(3A) | IVa(2B) | IVc(2B) | No SCC detected | V(5C2 and 5) | V(5C2) | VI(4B) |
|---------------|---------|---------|---------|-----------------|--------------|--------|--------|
| 0             | 1       | 0       | 1       | 1               | 1            | 6      | 3      |
| 1             | 0       | 2       | 0       | 0               | 2            | 0      | 0      |

Fisher's Exact Test p-value = 0.0459770114942529

seu CIP

|      |   |
|------|---|
| 0    | 1 |
| 0 11 | 4 |
| 1 0  | 3 |

Fisher's Exact Test p-value = 0.0428921568627451

seu LEV

|      |   |
|------|---|
| 0    | 1 |
| 0 11 | 4 |
| 1 0  | 3 |

Fisher's Exact Test p-value = 0.0428921568627451

hlgA hlgB

|     |    |
|-----|----|
| 0   | 1  |
| 0 2 | 1  |
| 1 0 | 15 |

Fisher's Exact Test p-value = 0.0196078431372549

sak CIP

```
0 1
0 6 0
1 5 7
```

Fisher's Exact Test p-value = 0.0377073906485671

sak LEV

```
0 1
0 6 0
1 5 7
```

Fisher's Exact Test p-value = 0.0377073906485671

sak Sequence.types

```
ST1 ST1-like ST121 ST1535 ST22 ST239 ST5 ST8 ST8-like ST80 ST913 STu
0 0 0 0 3 1 0 0 0 0 0 0 2
1 2 1 1 0 0 2 2 1 1 1 1 0
```

Fisher's Exact Test p-value = 0.023488255872064

scn SCCmec.element

```
I(1B), VI(4B) III(3A) IVa(2B) IVc(2B) No SCC detected V(5C2 and 5) V(5C2) VI(4B)
0 1 1 1 1 0 0 0 0
1 0 0 0 0 1 3 6 3
```

Fisher's Exact Test p-value = 0.00699650174912544

scn Ward.ICU

```
BMTU MICU MSU1 MSU2 MSU3 MSU4 MSU5 MSU6 SICU SICU2
0 0 3 0 0 0 1 0 0 0 0
1 1 0 2 1 0 1 4 2 1
```

Fisher's Exact Test p-value = 0.0259870064967516

scn WardType

```
BMTU MICU MSU SICU
0 0 3 1 0
1 1 0 9 3
```

Fisher's Exact Test p-value = 0.0204897551224388

E CIP

```
0 1
0 10 2
1 1 5
```

Fisher's Exact Test p-value = 0.0128205128205128

E LEV

```
0 1
0 10 2
1 1 5
```

Fisher's Exact Test p-value = 0.0128205128205128

E CD

```
0 1
0 11 1
1 1 5
```

Fisher's Exact Test p-value = 0.00393234216763629

E                    Sequence.types

|   |     |          |       |        |      |       |     |     |          |      |       |     |   |
|---|-----|----------|-------|--------|------|-------|-----|-----|----------|------|-------|-----|---|
|   | ST1 | ST1-like | ST121 | ST1535 | ST22 | ST239 | ST5 | ST8 | ST8-like | ST80 | ST913 | STu |   |
| 0 | 2   | 0        | 1     | 3      | 1    | 0     | 0   | 0   |          | 1    | 1     | 1   | 2 |
| 1 | 0   | 1        | 0     | 0      | 0    | 2     | 2   | 1   |          | 0    | 0     | 0   | 0 |

Fisher's Exact Test p-value = 0.0194902548725637

-----  
CIP LEV

|   |    |   |
|---|----|---|
|   | 0  | 1 |
| 0 | 11 | 0 |
| 1 | 0  | 7 |

Fisher's Exact Test p-value = 3.14228255404726e-05

-----  
CIP SXT

|   |   |   |
|---|---|---|
|   | 0 | 1 |
| 0 | 8 | 3 |
| 1 | 1 | 5 |

Fisher's Exact Test p-value = 0.0497737556561086

-----  
LEV SXT

|   |   |   |
|---|---|---|
|   | 0 | 1 |
| 0 | 8 | 3 |
| 1 | 1 | 5 |

Fisher's Exact Test p-value = 0.0497737556561086

-----  
Sequence.types SCCmec.element

|          |               |         |         |         |                 |              |        |        |
|----------|---------------|---------|---------|---------|-----------------|--------------|--------|--------|
|          | I(1B), VI(4B) | III(3A) | IVa(2B) | IVc(2B) | No SCC detected | V(5C2 and 5) | V(5C2) | VI(4B) |
| ST1      | 0             | 0       | 0       | 0       | 0               | 2            | 0      | 0      |
| ST1-like | 0             | 0       | 0       | 0       | 0               | 1            | 0      | 0      |
| ST121    | 0             | 0       | 0       | 0       | 0               | 0            | 1      | 0      |
| ST1535   | 0             | 0       | 0       | 0       | 0               | 0            | 3      | 0      |
| ST22     | 0             | 0       | 1       | 0       | 0               | 0            | 0      | 0      |
| ST239    | 0             | 2       | 0       | 0       | 0               | 0            | 0      | 0      |
| ST5      | 0             | 0       | 0       | 0       | 0               | 0            | 0      | 2      |
| ST8      | 0             | 0       | 0       | 0       | 0               | 0            | 1      | 0      |
| ST8-like | 0             | 0       | 0       | 0       | 1               | 0            | 0      | 0      |
| ST80     | 0             | 0       | 0       | 1       | 0               | 0            | 0      | 0      |
| ST913    | 0             | 0       | 0       | 0       | 0               | 0            | 1      | 0      |
| STu      | 1             | 0       | 0       | 0       | 0               | 0            | 0      | 1      |

Fisher's Exact Test p-value = 0.000999500249875062

-----  
Diagnosis Sample

|                         |       |     |                     |        |       |
|-------------------------|-------|-----|---------------------|--------|-------|
|                         | Blood | ETA | Infected prosthesis | Tissue | Wound |
| Acute kidney injury     | 1     | 0   | 0                   | 0      | 0     |
| CAUTI                   | 0     | 1   | 0                   | 0      | 0     |
| Diabetic foot           | 0     | 0   | 0                   | 2      | 0     |
| Febrile neutropnia      | 1     | 0   | 0                   | 0      | 0     |
| Fever with osteosarcoma | 1     | 0   | 0                   | 0      | 0     |
| IAI                     | 0     | 0   | 0                   | 0      | 1     |
| Infected prosthesis     | 0     | 0   | 1                   | 0      | 0     |
| LTX recipient           | 0     | 1   | 0                   | 0      | 0     |
| Osteomyelitis           | 0     | 0   | 0                   | 0      | 1     |
| Pneumonia               | 0     | 3   | 0                   | 0      | 0     |
| Sepsis                  | 2     | 0   | 0                   | 0      | 0     |
| SSI                     | 0     | 0   | 0                   | 1      | 0     |
| SSTI                    | 0     | 0   | 0                   | 0      | 1     |
| Urosepsis               | 1     | 0   | 0                   | 0      | 0     |

Fisher's Exact Test p-value = 0.00449775112443778

# Severity Sample

|   | Blood | ETA | Infected | prothesis | Tissue | Wound |
|---|-------|-----|----------|-----------|--------|-------|
| N | 0     | 0   |          | 1         | 3      | 3     |
| Y | 6     | 5   |          | 0         | 0      | 0     |

Fisher's Exact Test p-value = 0.000499750124937531

-----

## Ward.ICU WardType

|       | BMTU | MICU | MSU | SICU |
|-------|------|------|-----|------|
| BMTU  | 1    | 0    | 0   | 0    |
| MICU  | 0    | 3    | 0   | 0    |
| MSU1  | 0    | 0    | 2   | 0    |
| MSU2  | 0    | 0    | 2   | 0    |
| MSU3  | 0    | 0    | 1   | 0    |
| MSU4  | 0    | 0    | 1   | 0    |
| MSU5  | 0    | 0    | 1   | 0    |
| MSU6  | 0    | 0    | 4   | 0    |
| SICU  | 0    | 0    | 0   | 2    |
| SICU2 | 0    | 0    | 0   | 1    |

Fisher's Exact Test p-value = 0.000499750124937531

-----
